# Supplementary material
Source: PubMed Central journal article supplement (PMC9635566)
Supplement: NIHMS1817766-supplement-supp1-3092564.pdf [file NIHMS1817766-supplement-supp1-3092564.pdf]

# Supplementary material 1

Verification (ROC) and identification (CMC) curves for both traits individually and cumulatively for each of the experiments

## i. PCA-based encoding

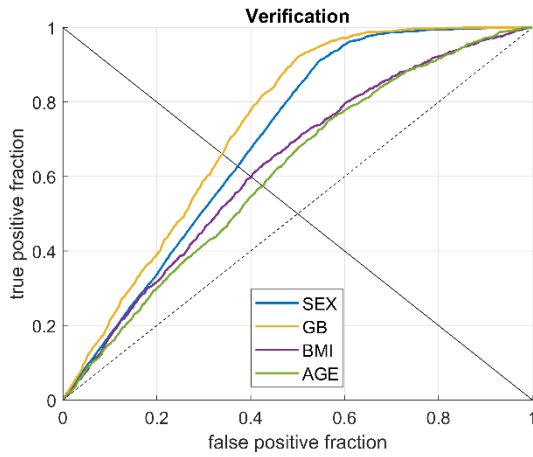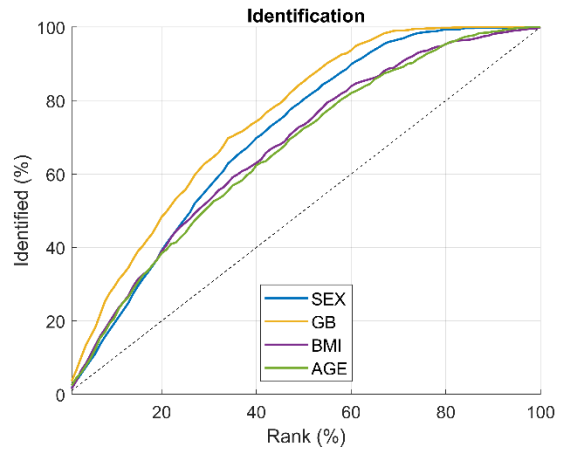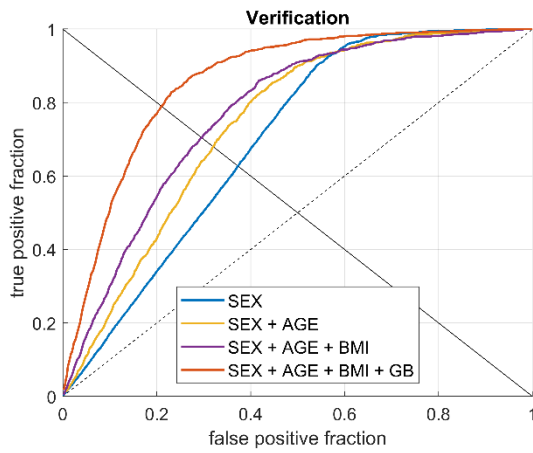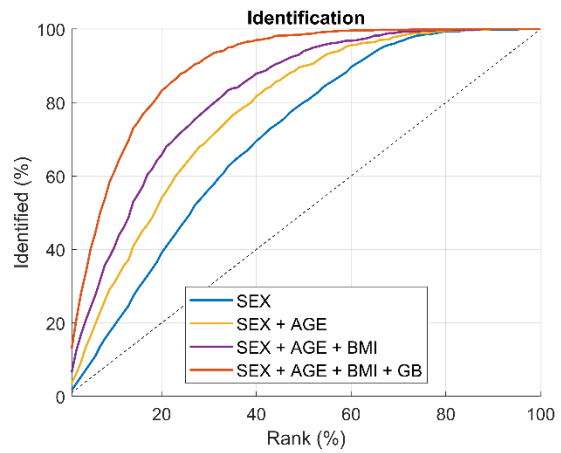

## ii. PCA-based encoding combined with part-based learning

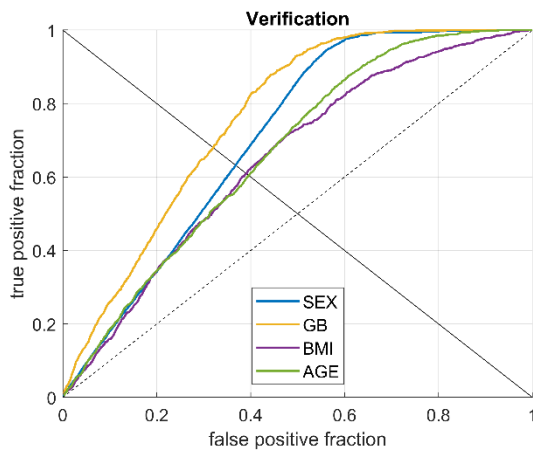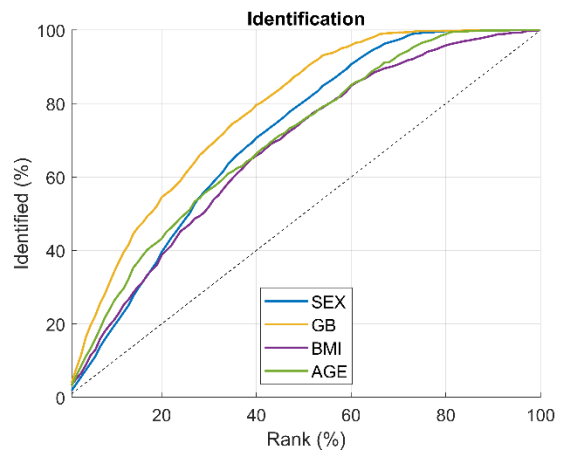

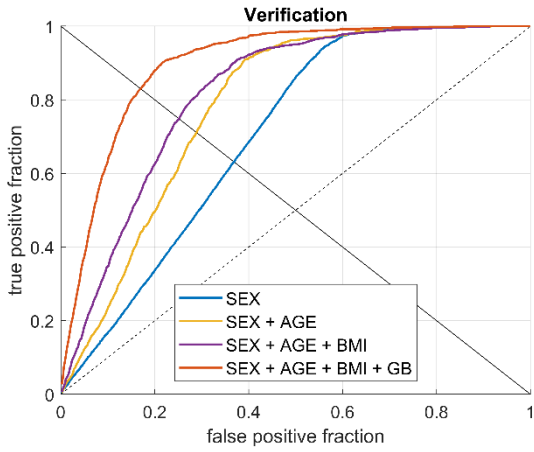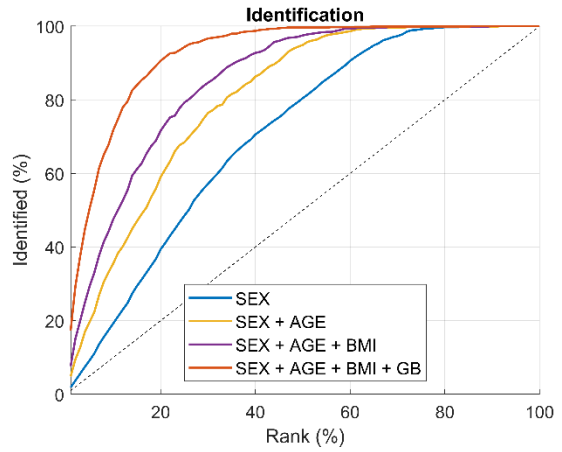

iii. GML-based encoding

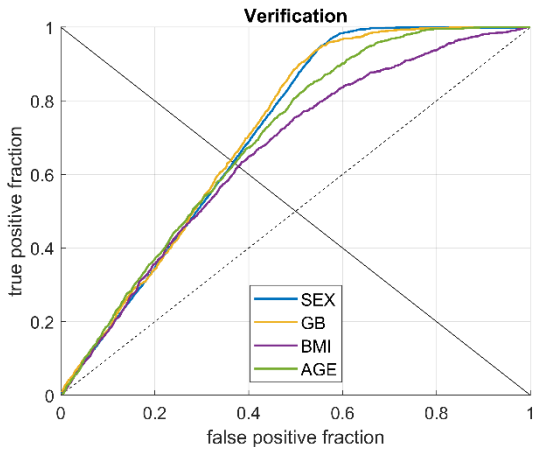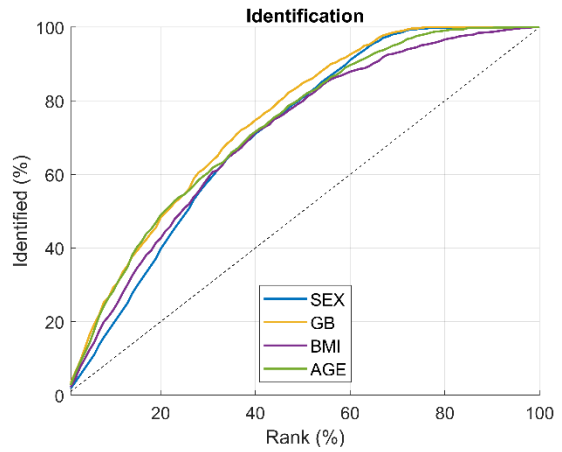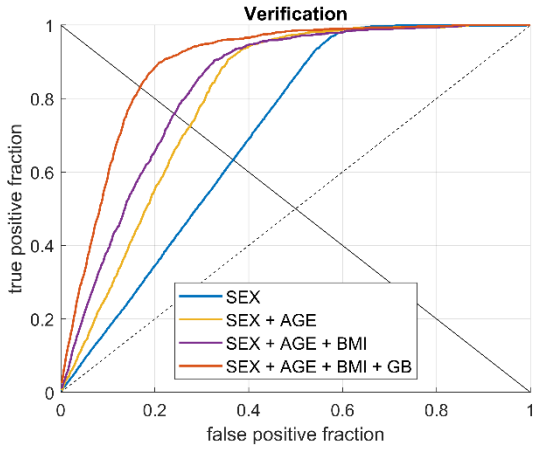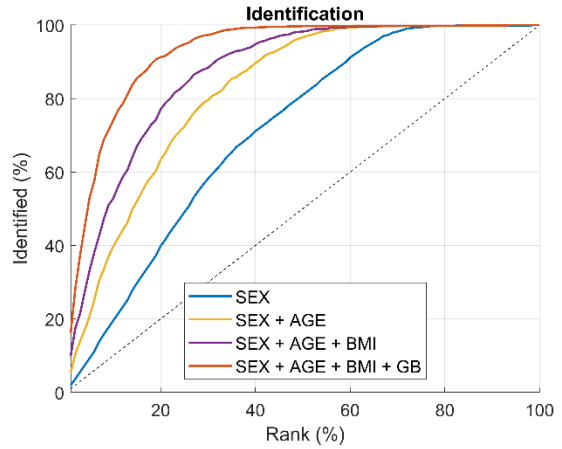

iv. GML-based encoding combined with part-based learning

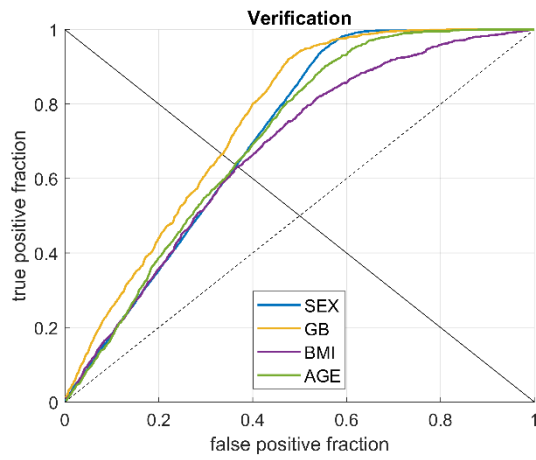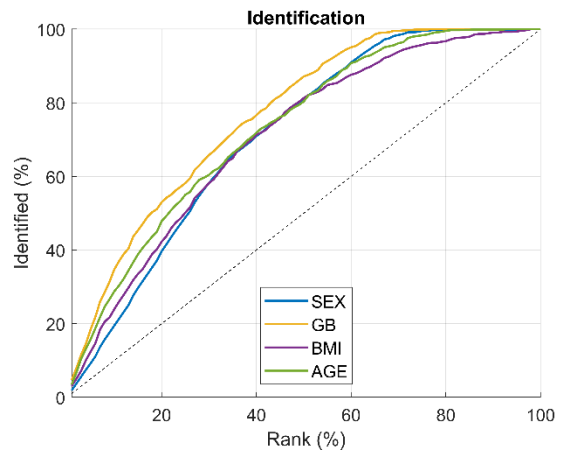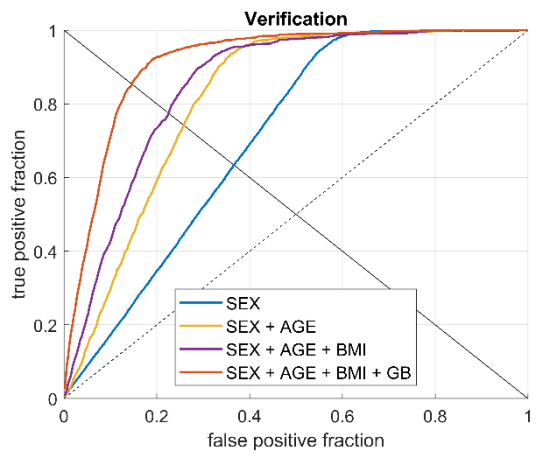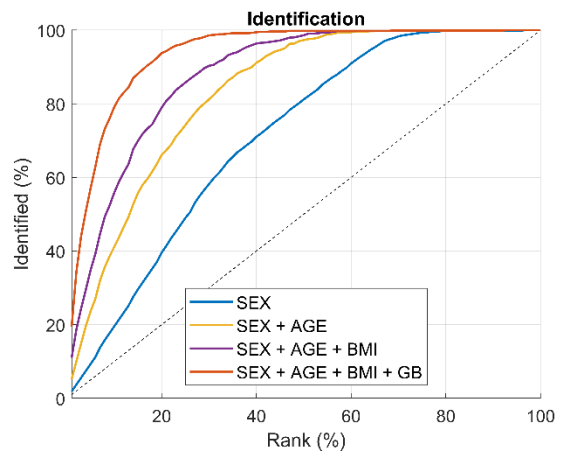

# Supplementary material 2

Table showing mean  $\pm$  std results for verification and identification when combining the GML (applied to a full face only) with (a) Fusion-Net and when using (b) SVM classifiers and regressors with a linear naive Bayes score fuser. Cumulative identification results for the Fusion-Net (a-Iden.) are lower than those for SVM + linear fuser (b-Iden.), and its contribution in verification scenario is very low (a-Ver. vs b-Ver.). This observation, and the impractical training procedure of the Fusion-Net with part-based embeddings, makes the linear fuser a better choice for evaluating the effect of our part-based GML.

|     |       |        | Sex           | Age           | BMI           | GB            | Sex + Age     | Sex + Age + BMI | Sex + Age + BMI + GB            |
|-----|-------|--------|---------------|---------------|---------------|---------------|---------------|-----------------|---------------------------------|
| (a) | Ver.  | EER    | .39 $\pm$ .03 | .36 $\pm$ .03 | .35 $\pm$ .03 | .29 $\pm$ .01 | .27 $\pm$ .03 | .28 $\pm$ .03   | <b>.17 <math>\pm</math> .01</b> |
|     |       | AUC    | .69 $\pm$ .02 | .71 $\pm$ .01 | .71 $\pm$ .01 | .79 $\pm$ .01 | .81 $\pm$ .03 | .81 $\pm$ .03   | <b>.91 <math>\pm</math> .00</b> |
|     | Iden. | R1(%)  | 2 $\pm$ 00    | 4 $\pm$ 01    | 2 $\pm$ 01    | 5 $\pm$ 02    | 4 $\pm$ 02    | 6 $\pm$ 02      | <b>15 <math>\pm</math> 02</b>   |
|     |       | R10(%) | 20 $\pm$ 00   | 30 $\pm$ 02   | 24 $\pm$ 03   | 37 $\pm$ 03   | 36 $\pm$ 07   | 36 $\pm$ 08     | <b>68 <math>\pm</math> 01</b>   |
|     |       | R20(%) | 39 $\pm$ 00   | 47 $\pm$ 03   | 42 $\pm$ 02   | 60 $\pm$ 02   | 59 $\pm$ 08   | 58 $\pm$ 06     | <b>88 <math>\pm</math> 01</b>   |
| (b) | Ver.  | EER    | .37 $\pm$ .01 | .37 $\pm$ .01 | .39 $\pm$ .01 | .36 $\pm$ .01 | .27 $\pm$ .01 | .24 $\pm$ .01   | <b>.17 <math>\pm</math> .01</b> |
|     |       | AUC    | .71 $\pm$ .01 | .69 $\pm$ .01 | .65 $\pm$ .01 | .72 $\pm$ .01 | .81 $\pm$ .01 | .83 $\pm$ .01   | <b>.89 <math>\pm</math> .01</b> |
|     | Iden. | R1(%)  | 2 $\pm$ 00    | 3 $\pm$ 01    | 2 $\pm$ 01    | 3 $\pm$ 01    | 5 $\pm$ 01    | 10 $\pm$ 02     | <b>17 <math>\pm</math> 02</b>   |
|     |       | R10(%) | 20 $\pm$ 00   | 29 $\pm$ 01   | 23 $\pm$ 03   | 30 $\pm$ 03   | 40 $\pm$ 02   | 54 $\pm$ 02     | <b>75 <math>\pm</math> 02</b>   |
|     |       | R20(%) | 40 $\pm$ 00   | 48 $\pm$ 04   | 42 $\pm$ 04   | 50 $\pm$ 03   | 64 $\pm$ 02   | 77 $\pm$ 02     | <b>92 <math>\pm</math> 02</b>   |
